# Supplementary material for: Canine urothelial carcinoma: expression of Periostin in spontaneous canine urothelial carcinoma and its correlation with histological features
Source: Front Vet Sci. 2023 Nov 16;10:1258247. doi: 10.3389/fvets.2023.1258247 (PMC10699308; doi:10.3389/fvets.2023.1258247)
Supplement: Supplementary file 1 [file Table_1.xlsx]

## Sheet: Sheet1
N	Breed	sex	Age	Tumor histological type	All layers	Muscular infiltration	Vascular invasion	Score	estension (%)	Mitotic count	Intensity	Grading Valli	Grading Meuten
1	Schnauzer miniature	M	12	UC papillary infiltrating	no	nd	no	2	0.15	15	1	II	H
2	Mixed breed	M	10	UC non papillary infiltrating	yes	yes	yes	3	0.3	17	2	III	H
3	Mixed breed	FS	13	UC papillary infiltrating	yes	no	no	2	0.1	30	1	II	H
4	Yorkshire	M	11	UC papillary infiltrating	yes	yes	yes	1	0.05	17	1	II	H
5	Drahthaar	F	13	UC papillary infiltrating	yes	no	no	2	0.1	30	1	III	H
6	Poodle	FS	12	UC papillary infiltrating	yes	no	no	1	0.05	32	1	II	H
7	Mixed breed	FS	15	UC papillary infiltrating	yes	no	no	0	0	28	0	II	H
8	Mixed breed	M	15	UC non papillary infiltrating	yes	yes	yes	2	0.1	27	1	III	H
9	Mixed breed	M	10	UC papillary infiltrating	yes	no	no	2	0.15	21	2	I	H
10	Hound	MC	11	UC papillary infiltrating	yes	no	no	2	0.1	25	2	III	H
11	Cocker americano	M	11	UC papillary infiltrating	yes	no	no	1	0.05	11	2	I	H
12	Beagle	FS	7	UC papillary infiltrating	yes	no	yes	0	0	18	0	I	H
13	Mixed breed	FS	12	UC papillary infiltrating	yes	yes	no	2	0.15	29	2	II	H
14	Mixed breed	FS	11	UC papillary infiltrating	yes	yes	yes	1	0.05	24	1	III	H
15	Labrador	M	8	UC papillary infiltrating	yes	yes	no	2	0.1	32	2	II	H
16	Mixed breed	FS	12	UC non papillary infiltrating	yes	yes	yes	3	0.25	4	0	I	H
17	WHWT	F	10	UC papillary infiltrating	yes	yes	yes	0	0	38	0	II	H
18	Sib Husky	M	11	UC papillary infiltrating	yes	yes	yes	0	0	28	0	III	H
19	Mixed breed	F	15	UC papillary infiltrating	yes	yes	yes	3	0.4	27	2	II	H
20	Yorkshire	F	11	UC papillary infiltrating	yes	yes	yes	2	0.07	28	1	I	H
21	Mixed breed	F	7	UC non papillary infiltrating	yes	yes	yes	1	0.05	36	1	II	H
22	WHWT	M	8	UC papillary infiltrating	no	nd	yes	3	0.3	19	1	II	H
23	Dachshund	F	15	UC papillary infiltrating	yes	yes	no	2	0.1	21	1	II	H
24	Bernese Mountain Dog	F	11	UC papillary infiltrating	yes	yes	no	3	0.4	16	2	III	H
25	Bernese Mountain Dog	F	11	UC papillary infiltrating	no	nd	yes	3	0.5	10	2	II	H
26	WHWT	M	9	UC papillary infiltrating	yes	yes	yes	4	0.55	8	1	II	H
27	Mixed breed	M	17	UC papillary infiltrating	no	nd	yes	3	0.3	19	1	I	H
28	Mixed breed	F	11	UC papillary infiltrating	no	nd	yes	3	0.3	6	1	II	H
29	Mixed breed	F	11	UC papillary infiltrating	no	nd	no	2	0.15	16	1	I	H
30	NR	NR	NR	UC papillary infiltrating	no	nd	no	2	0.15	15	2	I	H
31	Large swiss shepherd dog	F	7	UC non papillary infiltrating	yes	yes	yes	2	0.15	34	2	II	H
32	Mixed breed	M	14	UC papillary infiltrating	no	nd	no	2	0.1	48	1	II	H
33	Mixed breed	M	10	UC papillary infiltrating	no	nd	yes	3	0.5	9	2	I	H
34	Miniature shnauzer	F	9	UC papillary infiltrating	no	nd	yes	3	0.35	10	1	I	H
35	Bullterrier	F	NR	UC papillary infiltrating	yes	yes	yes	3	0.45	4	1	I	H
36	Mixed breed	F	13	UC papillary infiltrating	yes	yes	yes	4	0.6	39	2	II	H
37	Mixed breed	F	10	UC papillary infiltrating	yes	no	no	2	0.2	7	1	II	H
38	Mixed breed	M	10	UC non papillary infiltrating	yes	yes	yes	1	0.05	36	1	II	H
39	Dachshund	F	8	UC papillary infiltrating	yes	no	no	0	0	73	0	II	H
40	English Bulldog	M	11	UC papillary infiltrating	yes	yes	yes	3	0.25	7	2	II	H
41	Shitzu	M	12	UC papillary infiltrating	no	nd	no	1	0.03	21	1	III	H
42	Poodle	F	7	UC papillary infiltrating	no	nd	yes	1	0.05	28	2	II	H
43	Yorkshire terrier	F	8	UC non papillary infiltrating	yes	yes	yes	3	0.4	12	2	II	H
44	Labrador	M	11	UC papillary infiltrating	yes	yes	yes	4	0.6	11	3	II	H
45	Poodle	F	10	UC papillary infiltrating	no	nd	no	2	0.2	27	2	II	H
NR: not reported
